# Supplementary material
Source: publisher figshare collection journal article supplement (https://tandf.figshare.com/articles/dataset/_/3826731)
Supplement: Supplementary file 1 [file 1]

Archive with 2 entries (2 files):
- JASA_HDLV.zip
- UASA_A_1228536_Supplement.pdf
