# Supplementary material
Source: publisher figshare collection journal article supplement (https://tandf.figshare.com/articles/dataset/_/3826731)
Supplement: Supplementary file 1 [file 1 › UASA_A_1228536_Supplement.pdf]

# Supplementary Material to “Density Level Sets: Asymptotics, Inference, and Visualization”

Yen-Chi Chen\*

Department of Statistics, University of Washington  
and

Christopher R. Genovese<sup>†</sup>

Department of Statistics, Carnegie Mellon University  
and

Larry Wasserman<sup>‡</sup>

Department of Statistics, Carnegie Mellon University

August 18, 2016

## Abstract

This document contains proofs of theorems in ‘Density Level Sets: Asymptotics, Inference, and Visualization’.

*Keywords:* Nonparametric inference, asymptotic theory, level set clustering, anomaly detection, visualization

---

\*Supported by the William S. Dietrich II Presidential Ph.D. Fellowship and DOE grant number DE-FOA-0000918

<sup>†</sup>Supported by DOE grant number DE-FOA-0000918 and NSF grant number DMS-1208354

<sup>‡</sup>Supported by NSF grant number DMS-1208354

# A Proofs

**Theorem 8** (Theorem 2 in [Cuevas et al. \(2006\)](#)). Assume (K1-2) and (G), then we have

$$\text{Haus}(\widehat{D}_h, D_h) = O(\|\widehat{p}_h - p_h\|_{0,\max}).$$

**Theorem 9** (Talagrand's inequality; version of Theorem 12 in [Chen et al. \(2014a\)](#)). Assume (K1-2), then for each  $t > 0$  there exists some  $n_0$  such that whenever  $n > n_0$ , we have

$$\mathbb{P}(\|\widehat{p}_h - p_h\|_{\ell,\max}^* > t) \leq (\ell + 1)e^{-tnh^{d+2\ell}A_1},$$

for some constant  $A_1$  and  $\ell = 0, 1, 2$ . Moreover,

$$\mathbb{E}(\|\widehat{p}_h - p_h\|_{2,\max}^*) = O\left(\sqrt{\frac{\log n}{nh^{d+4}}}\right).$$

PROOF FOR LEMMA 1. We first prove the lower bound for  $\text{reach}(D_h)$  and then we will prove the additional assertions.

**Part 1: Lower bound on reach.** We prove this by contradiction. Take  $x$  near  $D_h$  such that

$$d(x, D_h) < \left(\frac{\delta_0}{2}, \frac{g_0}{\|p_h\|_{2,\max}^*}\right). \quad (1)$$

We assume that  $x$  has two projections onto  $D_h$ , denoted as  $b$  and  $c$ .

Since  $b, c \in D_h$ ,  $p_h(b) - \lambda = p_h(c) - \lambda = 0$  so that  $p_h(b) - p_h(c) = 0$ . Now by Taylor's theorem

$$\begin{aligned} \|(b - c)^T \nabla p_h(b)\| &= \|p_h(b) - p_h(c) - (b - c)^T \nabla p_h(b)\| \\ &\leq \frac{1}{2}\|b - c\|^2 \|p_h\|_{2,\max}. \end{aligned} \quad (2)$$

By the definition of projection, we can find a constant  $t_b \in \mathbb{R}$  such that  $x - b = t_b \nabla p_h(b)$ . Together with (2),

$$\begin{aligned} 2|(b - c)^T(x - b)| &= 2|(b - c)^T \nabla p_h(b) t_b| \\ &\leq \|(b - c)^T \nabla p_h(b)\| |t_b| \\ &\leq \|p_h\|_{2,\max} \|b - c\|^2 |t_b|. \end{aligned} \quad (3)$$

Since both  $b$  and  $c$  are projection points from  $x$  onto  $D_h$ ,

$$\|x - b\| = \|x - c\|.$$

Thus, we have

$$\begin{aligned} 0 &= \|x - c\|^2 - \|x - b\|^2 \\ &= \|b - c\|^2 + 2(b - c)^T(x - b) \\ &\geq \|b - c\|^2 - \|p_h\|_{2,\max} \|b - c\|^2 |t_b| \\ &= \|b - c\|^2 (1 - \|p_h\|_{2,\max} |t_b|). \end{aligned} \tag{4}$$

Recall that  $d(x, D_h) \leq \frac{g_0}{\|p_h\|_{2,\max}}$  and by Taylor's theorem,

$$\frac{g_0}{\|p_h\|_{2,\max}} > d(x, D_h) = \|x - b\| = \|t_b \nabla p_h(b)\| = |t_b| \|\nabla p_h(b)\| \geq |t_b| g_0 \tag{5}$$

so that  $|t_b| \|p_h\|_{2,\max} < 1$ . Note that the lower bound  $g_0$  in the last inequality is because  $d(x, D_h) < \frac{\delta_0}{2}$  so it follows from assumption (G). Plugging in this result into the last equality of (4), we conclude that  $\|b - c\| = 0$ . This shows  $b = c$  so that we have a unique projection. Thus, whenever  $d(x, D_h) < \left(\frac{\delta_0}{2}, \frac{g_0}{\|p_h\|_{2,\max}^*}\right)$ , we have a unique projection onto  $D_h$  and thus we have proved the lower bound on reach.

**Part 2: The three assertions.** The first assertion is trivially true when  $\|p_h - q\|_{2,\max}^*$  is sufficiently small since assumption (G) only involves gradients (first derivatives).

The second assertion follows from the lower bound on reach. By assertion 1, (G) holds for  $q$ . And the lower bound on reach is bounded by gradient and second derivatives so that we have the prescribed bound.

The third assertion follows from Theorem 1 in [Chazal et al. \(2007\)](#) which states that if two  $d - 1$  dimensional smooth manifolds  $M_1$  and  $M_2$  have Hausdorff distance being less than  $(2 - \sqrt{2}) \min\{\text{reach}(M_1), \text{reach}(M_2)\}$ , then  $M_1$  and  $M_2$  are normal compatible to each other. Now by Theorem 8, the Hausdorff distance between  $D_h$  and  $D(q)$  is at rate  $O(\|p_h - q\|_{1,\max})$  so that this assertion is true when  $\|p_h - q\|_{2,\max}$  is sufficiently small.  $\square$

**PROOF OF LEMMA 2.** Let  $x \in D_h$ . We define  $\Pi(x) \in D_h$  to be the projected point onto  $\widehat{D}_h$ . By Lemma 1 and Theorem 8, when  $\|\widehat{p}_h - p_h\|_{2,\max}^* \rightarrow 0$ ,  $\text{Haus}(D_h, \widehat{D}_h) \xrightarrow{P} 0$  so that  $\Pi(x)$  is unique. Thus, we assume  $\Pi(x)$  is unique.

Now since  $\Pi(x) \in \widehat{D}_h$  and  $x \in D_h$ ,  $\widehat{p}_h(\Pi(x)) - p_h(x) = 0$ . Thus, by Taylor's theorem

$$\begin{aligned}\widehat{p}_h(x) - p_h(x) &= \widehat{p}_h(x) - \widehat{p}_h(\Pi(x)) \\ &= (x - \Pi(x))^T (\nabla \widehat{p}_h(\Pi(x)) + O_{\mathbb{P}}(\|x - \Pi(x)\|)).\end{aligned}\tag{6}$$

Note that  $x - \Pi(x)$  is normal to  $\widehat{D}_h$  at  $\Pi(x)$  so that it points toward the same direction as  $\nabla \widehat{p}_h(\Pi(x))$ . Thus, (6) can be rewritten as

$$\widehat{p}_h(x) - p_h(x) = \|x - \Pi(x)\| (\|\nabla \widehat{p}_h(\Pi(x))\| + O_{\mathbb{P}}(\|x - \Pi(x)\|)).\tag{7}$$

By Taylor's theorem,  $\nabla \widehat{p}_h(\Pi(x))$  is close to  $\nabla p_h(x)$  in the sense that

$$\nabla \widehat{p}_h(\Pi(x)) = \nabla p_h(x) + O(\|\widehat{p}_h - p_h\|_{1,\max}^*).\tag{8}$$

In addition,  $O(\|x - \Pi(x)\|)$  is bounded by  $O(\text{Haus}(\widehat{D}_h, D_h))$  which is at rate  $O(\|\widehat{p}_h - p_h\|_{1,\max}^*)$  due to Theorem 8. Putting this together with (7), we conclude

$$\begin{aligned}\widehat{p}_h(x) - p_h(x) &= \|x - \Pi(x)\| (\|p_h(x)\| + O(\|\widehat{p}_h - p_h\|_{1,\max}^*)) \\ &= d(x, \widehat{D}_h) (\|p_h(x)\| + O(\|\widehat{p}_h - p_h\|_{1,\max}^*)).\end{aligned}\tag{9}$$

Note that the left hand side can be written as

$$\widehat{p}_h(x) - p_h(x) = \frac{1}{nh^d} \sum_{i=1}^n K\left(\frac{x - X_i}{h}\right) - \frac{1}{h^d} \mathbb{E}\left(K\left(\frac{x - X_i}{h}\right)\right) = \frac{1}{\sqrt{nh^d}} \mathbb{G}_n(\tilde{f}_x),\tag{10}$$

where  $\tilde{f}_x(y) = K\left(\frac{x-y}{h}\right)$ . After plugging (10) into the left hand side of (9), dividing both side by  $\|p_h(x)\|$  and setting  $f_x(y) = \frac{\tilde{f}_x(y)}{\sqrt{h^d}\|p_h(x)\|}$ , we obtain

$$\frac{\frac{1}{\sqrt{nh^d}} \mathbb{G}_n(f_x) - d(x, \widehat{D}_h)}{d(x, \widehat{D}_h)} = O(\|\widehat{p}_h - p_h\|_{1,\max}^*).\tag{11}$$

This holds uniformly for all  $x \in D_h$  and note that the definition of  $\mathcal{F}$  is

$$\mathcal{F} = \left\{ f_x(y) \equiv \frac{1}{\sqrt{h^d}\|\nabla p_h(x)\|} K\left(\frac{x-y}{h}\right) : x \in D_h \right\}.$$

So we conclude

$$\sup_{x \in D_h} \left| \frac{\frac{1}{\sqrt{nh^d}} \mathbb{G}_n(f_x) - d(x, \hat{D}_h)}{d(x, \hat{D}_h)} \right| = O(\|\hat{p}_h - p_h\|_{1, \max}^*).$$

□

**PROOF FOR THEOREM 3.** The proof for Theorem 3 follows the same procedure as the proof of Theorem 6 in [Chen et al. \(2014b\)](#). The proof contains two parts: Gaussian approximation and anti-concentration.

**Part 1: Gaussian approximation.** Basically, we will show that

$$\sqrt{nh^d} \text{Haus}(\hat{D}_h, D_h) \approx \sup_{f \in \mathcal{F}} |\mathbb{G}_n(f)| \approx \sup_{f \in \mathcal{F}} |\mathbb{B}(f)|,$$

where  $\mathbb{B}$  is a Gaussian process defined in (13) of the original paper.

First, when  $\|\hat{p}_h - p_h\|$  is sufficiently small,  $\hat{D}_h$  and  $D_h$  are normal compatible to each other by Lemma 1. Then by the property of normal compatible,

$$\sup_{x \in D_h} d(x, \hat{D}_h) = \text{Haus}(\hat{D}_h, D_h). \quad (12)$$

Thus, the difference

$$\begin{aligned} \left| \sqrt{nh^d} \text{Haus}(\hat{D}_h, D_h) - \sup_{f \in \mathcal{F}} |\mathbb{G}_n(f)| \right| &= \left| \sqrt{nh^d} \sup_{x \in D_h} d(x, \hat{D}_h) - \sup_{f \in \mathcal{F}} |\mathbb{G}_n(f)| \right| \\ &\leq \frac{\sup_{x \in D_h} \left| \frac{1}{\sqrt{nh^d}} \mathbb{G}_n(f_x) - d(x, \hat{D}_h) \right|}{\frac{1}{\sqrt{nh^d}}} \\ &= \sup_{x \in D_h} \left| \frac{\frac{1}{\sqrt{nh^d}} \mathbb{G}_n(f_x) - d(x, \hat{D}_h)}{d(x, \hat{D}_h)} \right| O_{\mathbb{P}}(1) \\ &= O(\|\hat{p}_h - p_h\|_{1, \max}^*). \end{aligned} \quad (13)$$

Note that the last two inequality follows from the fact that  $d(x, \hat{D}_h) \leq O_{\mathbb{P}}(\frac{1}{\sqrt{nh^d}})$ . By Theorem 9 the above result implies,

$$\mathbb{P} \left( \left| \sqrt{nh^d} \text{Haus}(\hat{D}_h, D_h) - \sup_{f \in \mathcal{F}} |\mathbb{G}_n(f)| \right| > t \right) \leq 2e^{-tnh^{d+2}A_2} \quad (14)$$

for some constant  $A_2$ .

Now by Corollary 2.2 in [Chernozhukov et al. \(2014c\)](#), there exists some random

variable  $\mathbf{B} \stackrel{d}{=} \sup_{f \in \mathcal{F}} |\mathbb{B}(f)|$  such that for all  $\gamma \in (0, 1)$  and  $n$  is sufficiently large,

$$\mathbb{P} \left( \left| \sup_{f \in \mathcal{F}} |\mathbb{G}_n(f)| - \mathbf{B} \right| > A_3 \frac{\log^{2/3}(n)}{\gamma^{1/3}(nh^d)^{1/6}} \right) \leq A_4 \gamma. \quad (15)$$

Note that this result basically follows from the same derivation of Proposition 3.1 in Chernozhukov et al. (2014c) with the fact that  $g \equiv 1$  in their definition.

Combining equations (14) and (15) and pick  $t = 1/\sqrt{nh^{d+2}}$ , we have that for  $n$  is sufficiently large and  $\gamma \in (0, 1)$ ,

$$\mathbb{P} \left( \left| \sqrt{nh^d} \text{Haus}(\widehat{D}_h, D_h) - \mathbf{B} \right| > A_3 \frac{\log^{2/3}(n)}{\gamma^{1/3}(nh^d)^{1/6}} + \frac{1}{\sqrt{nh^{d+2}}} \right) \leq A_4 \gamma + 2e^{-\sqrt{nh^{d+2}} A_2}. \quad (16)$$

**Part 2: Anti-concentration.** To obtain the desired Berry-Esseen bound, we apply the anti-concentration inequality in Chernozhukov et al. (2014c) and Chernozhukov et al. (2014a).

**Lemma 10** (Modification of Lemma 2.3 in Chernozhukov et al. (2014c)). *Let  $\mathbf{B} \stackrel{d}{=} \sup_{f \in \mathcal{F}} |\mathbb{B}(f)|$ , where  $\mathbb{B}$  and  $\mathcal{F}$  are defined as the above. Assume (K1-2) and that there exists a random variable  $Y$  such that  $\mathbb{P}(|Y - \mathbf{B}| > \eta) < \delta(\eta)$ . Then*

$$\sup_t |\mathbb{P}(Y < t) - \mathbb{P}(\mathbf{B} < t)| \leq A_5 \mathbb{E}(\mathbf{B}) \eta + \delta(\eta)$$

for some constant  $A_5$ .

It is easy to verify that assumptions (K1-2) imply the assumptions (A1-3) in Chernozhukov et al. (2014c) so that the result follows. Note that in the original Lemma 2.3 in Chernozhukov et al. (2014c),  $\mathbb{E}(\mathbf{B})$  should be replaced by  $\mathbb{E}(\mathbf{B}) + \log \eta$ . However,  $\mathbb{E}(\mathbf{B}) = O(\sqrt{\log n})$  due to Dudley's inequality for Gaussian process (Van Der Vaart and Wellner, 1996) and later we will find that  $\log \eta$  is also at this rate so we ignore  $\log \eta$ .

From Lemma 10 and equation (16), there exists some constant  $A_6$  such that

$$\begin{aligned} \sup_t \left| \mathbb{P} \left( \sqrt{nh^d} \text{Haus}(\widehat{D}_h, D_h) < t \right) - \mathbb{P} \left( \sup_{f \in \mathcal{F}} |\mathbb{B}(f)| < t \right) \right| \\ \leq A_5 \mathbb{E}(\mathbf{B}) \left( A_3 \frac{\log^{2/3}(n)}{\gamma^{1/3}(nh^d)^{1/6}} + \frac{1}{\sqrt{nh^{d+2}}} \right) + A_4 \gamma + 2e^{-\sqrt{nh^{d+2}}A_2} \quad (17) \\ \leq A_6 \left( A_3 \frac{\log^{7/6}(n)}{\gamma^{1/3}(nh^d)^{1/6}} + \sqrt{\frac{\log n}{nh^{d+2}}} \right) + A_4 \gamma + 2e^{-\sqrt{nh^{d+2}}A_2}. \end{aligned}$$

Now pick  $\gamma = \left( \frac{\log^7 n}{nh^d} \right)^{1/8}$  and use the fact that  $\frac{1}{\sqrt{nh^{d+2}}}$  and  $2e^{-\sqrt{nh^{d+2}}A_2}$  converges faster than the other terms; we obtain the desired rate.  $\square$

**PROOF FOR THEOREM 4.** This proof follows the same strategy for the proof of Theorem 7 in Chen et al. (2014b). We prove the Berry-Esseen type bound first and then show that the coverage is consistent. We prove the Berry-Esseen bound in two simple steps: Gaussian approximation and support approximation.

Let  $\mathcal{X}_n = \{(X_1, \dots, X_n) : \|\widehat{p}_h - p_h\|_{2,\max}^* \leq \eta_0\}$  for some small  $\eta_0$  so that whenever our data is within  $\mathcal{X}_n$ , (G) holds for  $\widehat{p}_h$ . By Lemma 1, such an  $\eta_0$  exists and by Theorem 9 we have  $\mathbb{P}(\mathcal{X}_n) \geq 1 - 3^{-nh^{d+4}\tilde{A}_0}$  for some constant  $\tilde{A}_0$ . Thus, we assume our original data  $X_1, \dots, X_n$  is within  $\mathcal{X}_n$ .

**Step 1: Gaussian approximation.** Let  $\widehat{\mathbb{P}}_n$  and  $\widehat{\mathbb{P}}_n^*$  be the empirical measure and the bootstrap empirical measure. A crucial observation is that for a function  $f_x(y) = K\left(\frac{x-y}{h}\right)$ ,

$$\widehat{\mathbb{P}}_n(f_x) = \int K\left(\frac{x-y}{h}\right) d\widehat{\mathbb{P}}_n(y) = h^d \widehat{p}_h(x). \quad (18)$$

Also note

$$\widehat{\mathbb{P}}_n^*(f_x) = \int K\left(\frac{x-y}{h}\right) d\widehat{\mathbb{P}}_n^*(y) = h^d \widehat{p}_h^*(x). \quad (19)$$

Therefore, for the bootstrap empirical process  $\mathbb{G}_n^* = \sqrt{n}(\widehat{\mathbb{P}}_n^* - \widehat{\mathbb{P}}_n)$ ,

$$\widehat{p}_h^*(x) - \widehat{p}_h(x) = \frac{1}{\sqrt{nh^d}} \mathbb{G}_n^*(f_x). \quad (20)$$

Thus, if we sample from  $\widehat{p}_h$  and consider estimating  $\widehat{p}_h$  by  $\widehat{p}_h^*$ , we are doing exactly the same procedure of estimating  $p_h$  by  $\widehat{p}_h$ . Therefore, Lemma 2 and Theorem 3 hold

for approximating  $\text{Haus}(\widehat{D}_h^*, \widehat{D}_h)$  by a maxima for a Gaussian process. The difference is that the Gaussian process is defined on

$$\mathcal{F}_n = \left\{ f_x(y) \equiv \frac{1}{\sqrt{nh^d} \|\nabla \widehat{p}_h(x)\|} K\left(\frac{x-y}{h}\right) : x \in \widehat{D}_h \right\} \quad (21)$$

since the “parameter (level sets)” being estimated is  $\widehat{D}_h$  (the estimator is  $\widehat{D}_h^*$ ). Note that  $\mathcal{F}_n$  is very similar to  $\mathcal{F}$  except the denominator is slightly different and the support  $\widehat{D}_h$  is also different from  $D_h$ . That is, we have

$$\begin{aligned} \sup_t \left| \mathbb{P} \left( \sqrt{nh^d} \text{Haus}(\widehat{D}_h^*, \widehat{D}_h) < t \middle| X_1, \dots, X_n \right) \right. \\ \left. - \mathbb{P} \left( \sup_{f \in \mathcal{F}_n} |\mathbb{B}_n(f)| < t \middle| X_1, \dots, X_n \right) \right| \leq O \left( \left( \frac{\log^7 n}{nh^d} \right)^{1/8} \right), \end{aligned} \quad (22)$$

where  $\mathbb{B}_n$  is a Gaussian process on  $\mathcal{F}_n$  such that for any  $f_1, f_2 \in \mathcal{F}_n$ ,

$$\mathbb{E}(\mathbb{B}_n(f_1) | X_1, \dots, X_n) = 0, \quad \text{Cov}(\mathbb{B}_n(f_1), \mathbb{B}_n(f_2) | X_1, \dots, X_n) = \frac{1}{n} \sum_{i=1}^n f_1(X_i) f_2(X_i). \quad (23)$$

**Step 2: Support approximation.** In this step, we will show that

$$\sup_{f \in \mathcal{F}_n} |\mathbb{B}_n(f)| \approx \sup_{f \in \mathcal{F}} |\mathbb{B}_n(f)| \approx \sup_{f \in \mathcal{F}} |\mathbb{B}(f)|. \quad (24)$$

The first approximation can be shown by using the Gaussian comparison lemma (Theorem 2 in [Chernozhukov et al. \(2014b\)](#); also see Lemma 17 in [Chen et al. \(2014b\)](#)). We do the same thing as Step 3 in the proof of Theorem 8 in [Chen et al. \(2014b\)](#) so we omit the details. Essentially, given any  $\epsilon > 0$ , we can construct a pair of balanced  $\epsilon$ -nets for both  $\mathcal{F}$  and  $\mathcal{F}_n$ , denoted as  $\{g_1, \dots, g_K\}$  and  $\{g_1^n, \dots, g_K^n\}$  so that  $\max_j \|g_j - g_j^n\|_{\max}^* = O(\|\widehat{p}_h - p_h\|_{1, \max}^*)$ . Then this  $\epsilon$ -net leads to

$$\begin{aligned} \sup_t \left| \mathbb{P} \left( \sup_{f \in \mathcal{F}_n} |\mathbb{B}_n(f)| < t \middle| X_1, \dots, X_n \right) \right. \\ \left. - \mathbb{P} \left( \sup_{f \in \mathcal{F}} |\mathbb{B}_n(f)| < t \middle| X_1, \dots, X_n \right) \right| \leq O \left( (\|\widehat{p}_h - p_h\|_{1, \max}^*)^{1/3} \right). \end{aligned} \quad (25)$$

The difference between  $\sup_{f \in \mathcal{F}_n} |\mathbb{B}_n(f)|$  and  $\sup_{f \in \mathcal{F}} |\mathbb{B}(f)|$  is small since the these two

Gaussian processes differ in their covariance but as  $n \rightarrow \infty$ , the covariances converges at rate  $1/\sqrt{n}$  so that we can neglect the difference between them. Thus, combining (22) and (25) and the argument from previous paragraph, we conclude

$$\begin{aligned} \sup_t \left| \mathbb{P} \left( \sqrt{nh^d} \text{Haus}(\widehat{D}_h^*, \widehat{D}_h) < t \middle| X_1, \dots, X_n \right) - \mathbb{P} \left( \sup_{f \in \mathcal{F}} |\mathbb{B}(f)| < t \right) \right| \\ \leq O \left( \left( \frac{\log^7 n}{nh^d} \right)^{1/8} \right) + O \left( (\|\widehat{p}_h - p_h\|_{1, \max}^*)^{1/3} \right). \end{aligned} \quad (26)$$

Now comparing the above result to Theorem 3 and using the fact that the first big-O term dominates the second term (the first is of rate  $-1/8$  for  $n$  but the second term is at rate  $-1/6$  by Theorem 9), we conclude the result for first assertion.

For the coverage, let  $W_n = \text{Haus}(\widehat{D}_h, D_h)$  and  $w_{n,1-\alpha} = F_{W_n}^{-1}(1 - \alpha)$ . Since  $D_h \subset \widehat{D}_h \oplus \text{Haus}(\widehat{D}_h, D_h)$ , we have

$$\mathbb{P}(D_h \subset \widehat{D}_h \oplus w_{n,1-\alpha}) = 1 - \alpha. \quad (27)$$

Now by the first assertion, the difference for  $w_{n,1-\alpha}$  and the bootstrap estimate  $w_{n,1-\alpha}^*$  differs at rate  $O \left( \left( \frac{\log^7 n}{nh^d} \right)^{1/8} \right)$ , which completes the proof.

□

## References

- F. Chazal, A. Lieutier, and J. Rossignac. Normal-map between normal-compatible manifolds. *International Journal of Computational Geometry & Applications*, 17(05):403–421, 2007.
- Y.-C. Chen, C. R. Genovese, R. J. Tibshirani, and L. Wasserman. Nonparametric modal regression. *arXiv preprint arXiv:1412.1716*, 2014a.
- Y.-C. Chen, C. R. Genovese, and L. Wasserman. Asymptotic theory for density ridges. *arXiv preprint arXiv:1406.5663*, 2014b.
- V. Chernozhukov, D. Chetverikov, and K. Kato. Anti-concentration and honest, adaptive confidence bands. *The Annals of Statistics*, 42(5):1787–1818, 2014a.
- V. Chernozhukov, D. Chetverikov, and K. Kato. Comparison and anti-concentration

bounds for maxima of gaussian random vectors. *Probability Theory and Related Fields*, pages 1–24, 2014b.

V. Chernozhukov, D. Chetverikov, and K. Kato. Gaussian approximation of suprema of empirical processes. *The Annals of Statistics*, 42(4):1564–1597, 2014c.

A. Cuevas, W. González-Manteiga, and A. Rodríguez-Casal. Plug-in estimation of general level sets. *Australian & New Zealand Journal of Statistics*, 48(1):7–19, 2006.

A. W. Van Der Vaart and J. A. Wellner. *Weak Convergence*. Springer, New York, 1996.

—
